# Supplementary material
Source: PubMed Central journal article supplement (PMC2000421)

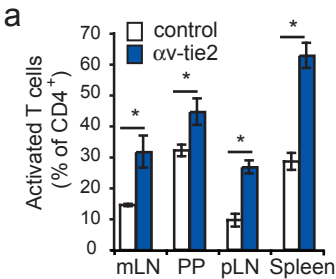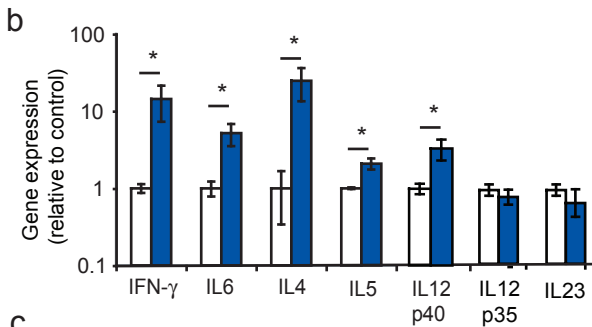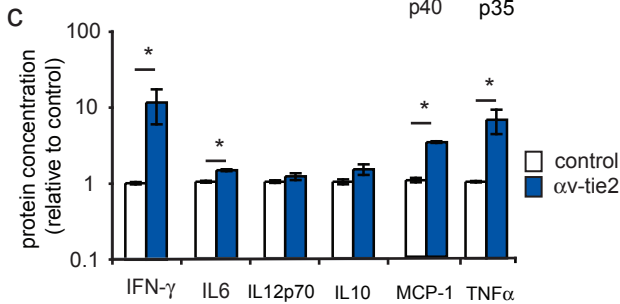

Supplement: pnas_0707421104_5.pdf [file pnas_0707421104_5.pdf]
